# Supplementary material for: High-Sensitive Detection and Quantitative Analysis of Thyroid-Stimulating Hormone Using Gold-Nanoshell-Based Lateral Flow Immunoassay Device
Source: MDPI journal article supplement (doi:10.3390/bios12030182), 2022-03-19
Supplement: s1 [file s1]

### **Supplementary Materials**

Table S1: Shows the concentration of biomarkers in the calibrators.

| Calibrator | TSH ( $\mu$ IU/ml) | FT3 (ng/ml) | FT4 (ng/ml) |
|------------|--------------------|-------------|-------------|
| 1          | 0.08               | 0.11        | 0           |
| 2          | 0.16               | 0.23        | 0           |
| 3          | 0.327              | 0.46        | 0           |
| 4          | 1.014              | 1.4         | 1.27        |
| 5          | 4.182              | 3.4         | 3.38        |
| 6          | 5.54               | 7.47        | 7.61        |
| 7          | 7.839              | 12.48       | 10.25       |
| 8          | 9.501              | 25.05       | 17.29       |
| 9          | 23.177             | 58.03       | 35.49       |
| 10         | 43.903             | 96.2        | 47.89       |
| 11         | 85.49              | 193.44      | 138.02      |

Table S2: Shows the concentration of TSH in the disease state plasma as provided by the BIO-IVT and determined value by using the calibration curve.

| Plasma Samples | TSH levels ( $\mu$ IU/ml) as given by Bio-IVT | TSH levels( $\mu$ IU/ml) determined | Recovery (%) |
|----------------|-----------------------------------------------|-------------------------------------|--------------|
| 74343A1        | 1.27                                          | 0.92                                | 72           |
| 74388A1        | 1.6                                           | 1.32                                | 82.5         |
| 406430A2       | 2                                             | 2.05                                | 102          |

Table S3: Shows the concentration of TSH in the quality controls as provided by the Randox and determined value by using the calibration curve.

| Quality Controls | TSH levels ( $\mu$ IU/ml) as determined by Roche Elecsys | TSH levels( $\mu$ IU/ml) determined | Recovery (%) |
|------------------|----------------------------------------------------------|-------------------------------------|--------------|
| L3               | 22.6                                                     | 22.7                                | 100          |
| L2               | 2.7                                                      | 3.13                                | 115          |
| L1               | 0.22                                                     | 0.27                                | 127          |

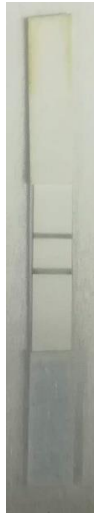

Figure S1: Shows the digital photograph of the lateral flow assay strip.

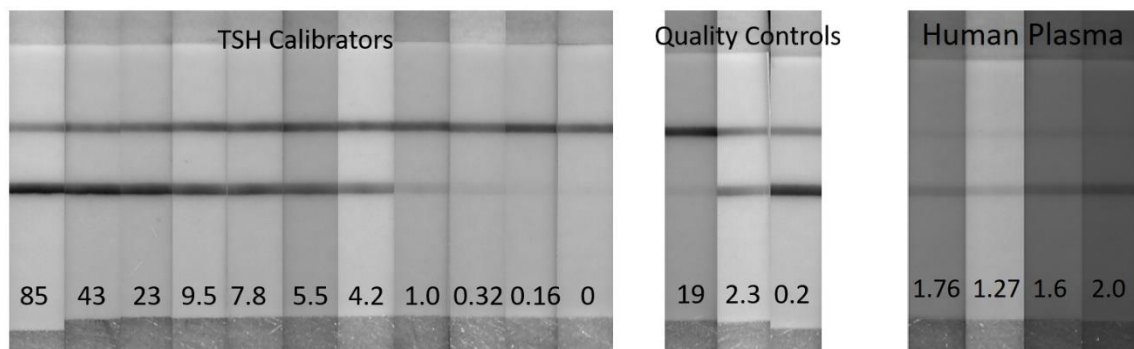

Figure S2: Representative photographs taken from the 150 nm gold nanoshells-based LFAs with 50  $\mu$ l of TSH calibrators, quality controls, and human plasma.
